# Supplementary material for: Environment Controls Seasonal and Daily Cycles of Stem Diameter Variations in Portuguese Oak (Quercus faginea Lambert)
Source: MDPI journal article supplement (doi:10.3390/f13020170), 2022-01-22
Supplement: s1 [file s1]

Archive with 1 entries (1 files):
- forests-1556547-supplementary.pdf
