# Supplementary material for: Environment Controls Seasonal and Daily Cycles of Stem Diameter Variations in Portuguese Oak (Quercus faginea Lambert)
Source: MDPI journal article supplement (doi:10.3390/f13020170), 2022-01-22
Supplement: s1 [file s1 › forests-1556547-supplementary.pdf]

## Supplementary material for:

### Environment controls seasonal and daily cycles of stem diameter variations in Portuguese oak (*Quercus faginea* Lambert)

Vieira J., Campelo F., and Nabais C. (2022)

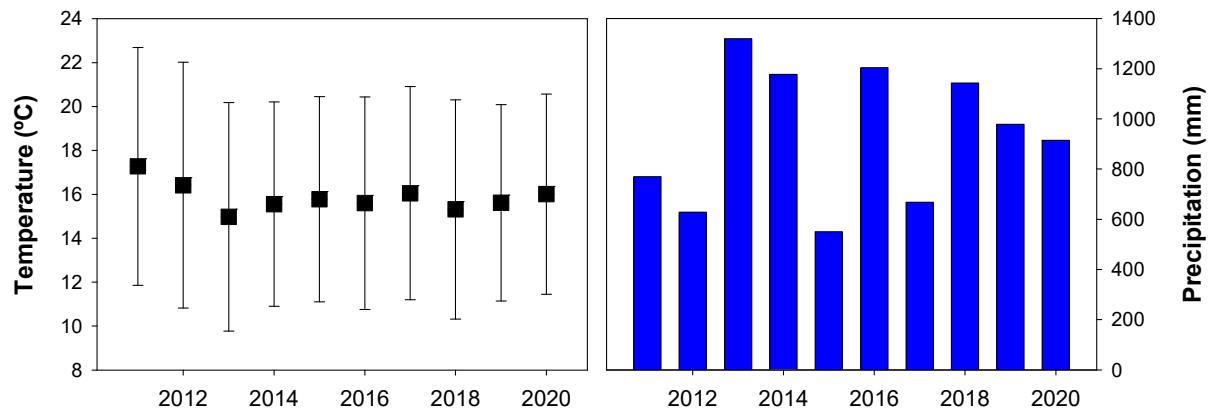

**Figure S1.** Mean annual temperature (squares, whiskers represent standard deviation) and total precipitation (blue bars), for the period 2011-2020.

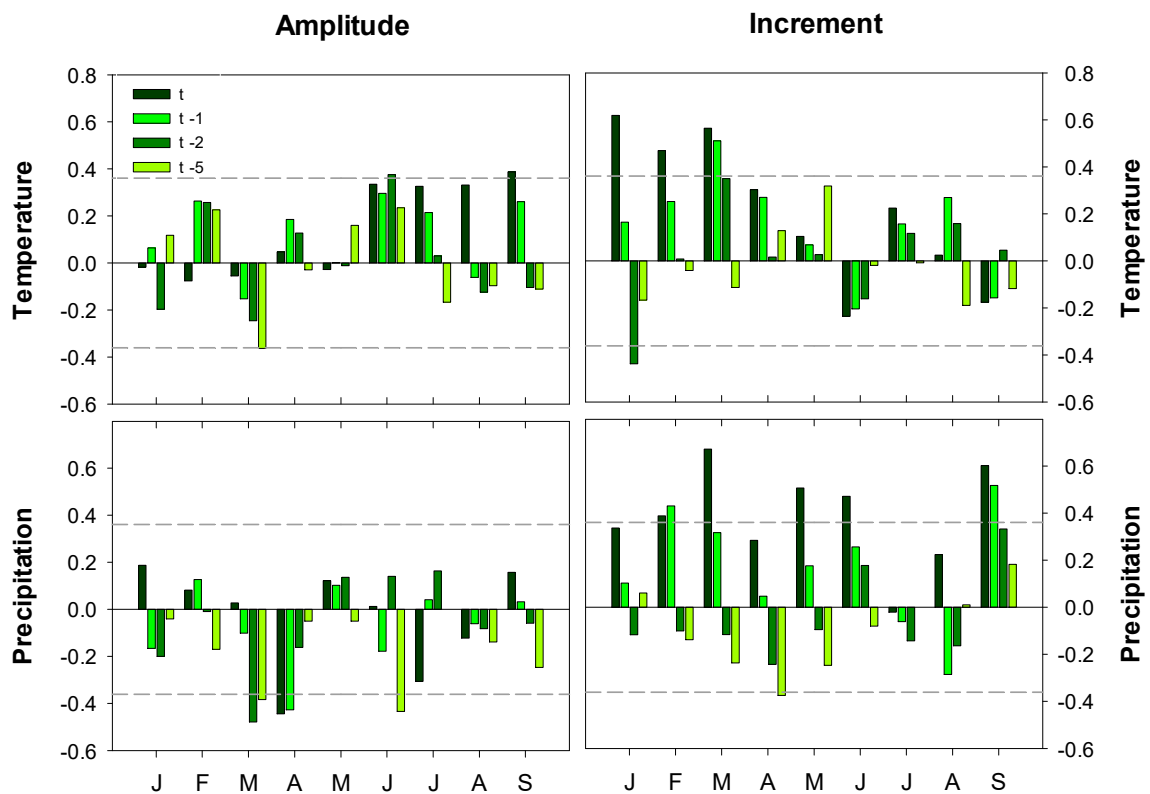

**Figure S2.** Spearman's rank-order correlations between daily cycle amplitude and increment, and mean temperature and precipitation. Spearman's correlation coefficients ( $\rho$ ) were calculated for the current day ( $t$ ) and considering lags up to 5 days ( $t-n$ , where the  $n$  indicates the number of previous days). Horizontal dashed lines represent the significance level at  $p < 0.05$ .
